# Supplementary material for: Prednisone and amoxicillin/clavulanic acid for the treatment of hidradenitis suppurativa flares: a prospective observational study
Source: PubMed Central journal article supplement (PMC11230732; doi:10.1097/jw9.0000000000000162), 2024-07-08
Supplement: jw9-10-e162-s001.pdf [file jw9-10-e162-s001.pdf]

Supplement

**Patient global impression of hidradenitis suppurativa (HS) severity (PGI-S-HS)**

How would you rate the overall severity of your HS over the past 7 days?

|   |                   |
|---|-------------------|
| 1 | Not present       |
| 2 | Very mild         |
| 3 | Mild              |
| 4 | Moderate          |
| 5 | Moderately severe |
| 6 | Severe            |
| 7 | Very severe       |

**Patient global impression of change in hidradenitis suppurativa (HS) severity (PGI-C-HS)**

Perception of change in HS since started taking the study medication:

|   |                    |
|---|--------------------|
| 1 | Very much improved |
| 2 | Much improved      |
| 3 | Minimally Improved |
| 4 | No change          |
| 5 | A little worse     |
| 6 | Much worse         |
| 7 | Very much worse    |
